# Supplementary material
Source: HighWire-hosted journal article supplement (https://lupus.bmj.com/content/5/1/e000247)
Supplement: inline-supplementary-material-1 [file inline-supplementary-material-1.docx]

**Supplemental Table 1: Multivariate analysis of the influence of race/ethnicity and region and age of onset and coautoimmune diseases.**

| **Parameter Evaluated** | **Models With Region as a Significant Covariate** | |
| --- | --- | --- |
| **Race1** | **Region2** |
| Age of Onset |  | none |
| ILD |  | none |
| Myalgia | His | Canada OR=0.587 CI=(0.2576,1.2686) P= 0.1846 |
|  |  | **Latin America OR=0.2847 CI=(0.1554,0.5028) P<0.0001** |
| Raynaud Phenomenon |  | none |
| Scleroderma |  | none |
| Sicca |  | none |
| Sjӧgren’s Syndrome |  | none |

Backward model selection using Bayesian information criterion (BIC) criteria were performed by function “step” in R (setting upper model = race + region, lower model = race) to evaluate race effect with region as a covariate in the model. 1The reference level of race is Native American. 2The reference region includes subjects from the continental United States and Puerto Rico. Latin America includes Colombia, British Virgin Islands and Barbados. Regions that confound the differences based on race are in bold. “None” indicates that region was not selected in the final model.

**Supplemental Table 2: Multivariate analysis of the influence of race/ethnicity and region and differences in autoantibody levels**

| **Autoantibody** | **Models With Region as a Significant Covariate** |
| --- | --- |
| dsDNA | none |
| La | none |
| RiboP | none |
| RNP | none |
| Ro | none |
| Sm | none |
| UIL | none |
| APL-IgG | none |
| APL-IgM | none |

Backward model selection using Bayesian information criterion (BIC) criteria were performed by function “step” in R (setting upper model = race + region, lower model = race) to evaluate race effect with region as a covariate in the model. The reference level of race is Native American. The reference region includes subjects from the continental United States and Puerto Rico. Latin America includes Colombia, British Virgin Islands and Barbados. For autoantibody levels, region was not selected to the final model.

**Supplemental Table 3: Multivariate analysis of the influence of race/ethnicity and region and differences in ACR criteria.**

| **ACR Criteria** | **Models With Region as a Significant Covariate** |
| --- | --- |
| Arthritis | none |
| Cellular Casts | none |
| Discoid Rash | none |
| Hemolytic | none |
| Leukopenia | none |
| Lymphopenia | none |
| Malar Rash | none |
| Oral Ulcers | none |
| Pericarditis | none |
| Photosensitivity | none |
| Pleuritis | none |
| Proteinuria | none |
| Psychosis | none |
| Seizures | none |

Backward model selection using Bayesian information criterion (BIC) criteria were performed by function “step” in R (setting upper model = race + region, lower model = race) to evaluate race effect with region as a covariate in the model. The reference level of race is Native American. The reference region includes subjects from the continental United States and Puerto Rico. Latin America includes Colombia, British Virgin Islands and Barbados. For ACR criteria, region was not selected to the final model.

**Supplemental Table 4: Multivariate analysis of the influence of race/ethnicity and region and differences in prescription use.**

| **Drug** | **Models With Region as a Significant Covariate** | |
| --- | --- | --- |
| **Race1** | **Region2** |
| Azathioprine |  | none |
| Cyclophosphamide |  | none |
| Hydroxychloroquine | His | Canada OR=1.1729 CI=(0.4769,3.5222) P=0.7493 |
|  |  | **Latin America OR=0.1027 CI=(0.0555,0.1841) P<0.0001** |
| Methotrexate |  | none |
| Mycophenolate Mofetil |  | none |

Backward model selection using Bayesian information criterion (BIC) criteria were performed by function “step” in R (setting upper model = race + region, lower model = race) to evaluate race effect with region as a covariate in the model. Regional influences if any are in bold. 1The reference level of race is Native American. 2The reference region includes subjects from the continental United States and Puerto Rico. Latin America includes Colombia, British Virgin Islands and Barbados. Regions that confound the differences based on race are in bold. “None” indicates that region was not selected in the final model.
